# Supplementary material for: Structure, electronic properties and catalytic behaviour of an activity-enhancing CYP102A1 (P450BM3) variant
Source: Royal Society of Chemistry journal article supplement (doi:10.1039/c1dt10098j), 2011-01-01
Supplement: c1dt10098j.pdf [file c1dt10098j.pdf]

**Table S1. A comparison of distances and side-chain conformations in selected P450<sub>BM3</sub> crystal structures.** SF WT data are the average of three substrate-free structures (PDB codes: 2HPD, 1BU7 and 2IJ2). SB WT data are the average of three substrate-bound structures (PDB codes: 1FAG, 1JPZ and 1ZO9). SB ex WT data are the average of two substrate-bound mutant structures (PDB codes: 2UWH and 3CBD). The data for each individual PDB structure were calculated by averaging all the molecules in the asymmetric cell.

| (Å)                                          | SF WT      | SB WT          | SB ex WT       | KT2           | I401P      |
|----------------------------------------------|------------|----------------|----------------|---------------|------------|
| <b>Axial water ligand distances</b>          |            |                |                |               |            |
| Fe–OH <sub>2</sub>                           | 2.4        | <b>3.5</b>     | <b>3.3</b>     | 2.6           | <b>3.6</b> |
| Ala264CO–OH <sub>2</sub>                     | 2.7        | 2.8            | 3.0            | <b>3.7</b>    | 3.0        |
| <b>Inter-I-helix distances</b>               |            |                |                |               |            |
| Thr260CO–Ala264NH                            | 2.9        | 2.8            | 2.8            | 2.8           | 2.8        |
| Phe261CO–Gly265NH                            | 3.0        | 2.9            | 2.9            | 2.6           | 2.8        |
| Leu262CO–His266NH                            | 3.1        | <b>3.8</b>     | <b>3.9</b>     | <b>3.8</b>    | <b>3.9</b> |
| Ile263CO–Glu267NH                            | <b>4.8</b> | 3.2            | 3.1            | 3.3           | <b>5.2</b> |
| Ala264CO–Thr268NH                            | <b>4.6</b> | <b>4.8</b>     | <b>5.0</b>     | <b>4.9</b>    | <b>4.6</b> |
| Gly265CO–Thr269NH                            | 3.4        | <b>6.0</b>     | <b>6.0</b>     | <b>5.9</b>    | <b>5.7</b> |
| His266NH–Ser270NH                            | 3.2        | 3.0            | 2.9            | 2.9           | 2.9        |
| Glu267NH–Gly271NH                            | 2.9        | 3.1            | 3.1            | 3.1           | 2.9        |
| Thr268NH–Leu272NH                            | 3.1        | 3.0            | 3.0            | 3.0           | 3.0        |
| His266Nδ–Leu262CO                            | 2.9        | <b>4.8 (*)</b> | <b>4.8</b>     | <b>4.9</b>    | 2.8        |
| His266Nδ–Ile263CO                            | 3.2        | <b>5.1 (*)</b> | <b>4.9</b>     | <b>4.9</b>    | <b>5.4</b> |
| Gly265CO–Thr268OH                            | 3.3        | <b>6.3</b>     | <b>6.5</b>     | <b>6.2</b>    | <b>5.4</b> |
| Gly265CO–Thr269OH                            | 2.9        | <b>4.5</b>     | <b>4.5</b>     | <b>4.4</b>    | <b>4.3</b> |
| <b>I-helix/G-helix distances</b>             |            |                |                |               |            |
| Lys224NH <sub>2</sub> –Asp251CO <sub>2</sub> | 3.1        | <b>8.0</b>     | <b>8.5</b>     | <b>8.1</b>    | (‡)        |
| Asp217Ca–Arg255Ca                            | 6.3        | <b>8.5</b>     | <b>8.4 (†)</b> | <b>8.2</b>    | 6.3        |
| <b>Side-chain rotations</b>                  |            |                |                |               |            |
| Phe87 ring (ca. 90°)                         | No         | <b>Yes</b>     | <b>Yes</b>     | <b>Mol. B</b> | No         |
| Phe158 at Cβ (ca. 90°)                       | No         | <b>Yes</b>     | <b>Yes</b>     | <b>Yes</b>    | No         |
| Phe261 ring (ca. 90°)                        | No         | <b>Yes</b>     | <b>Yes</b>     | <b>Yes</b>    | No         |
| His 266 ring (ca. 180°)                      | No         | <b>Yes</b>     | <b>Yes</b>     | <b>Yes</b>    | No         |
| Glu267 carboxylate (ca. 90°)                 | No         | <b>Yes</b>     | <b>Yes</b>     | <b>Yes</b>    | <b>Yes</b> |
| <b>Side-chain displacements</b>              |            |                |                |               |            |
| His266 (towards the E-helix)                 | No         | <b>Yes</b>     | <b>Yes</b>     | <b>Yes</b>    | <b>Yes</b> |
| Leu437 (away from Phe87Cζ)                   | No         | <b>Yes</b>     | <b>Yes</b>     | <b>Mol. B</b> | No         |

(\*) Based on the supposition that the imidazole ring of His266 in the *N*-palmitoyl methionine structure (1ZO9) is rotated through 180° relative to SF structures, as in the *N*-palmitoyl glycine-bound and other SB crystal structures rather than as depicted in the current PDB file.

(†) Residue 255 is serine in 139-3

(‡) Lys224 is unresolved in both I401P molecules
